# Supplementary material for: The parasite Trichomonas vaginalis expresses thousands of pseudogenes and long non-coding RNAs independently from functional neighbouring genes
Source: PubMed Central journal article supplement (PMC4223856; doi:10.1186/1471-2164-15-906), 2014-10-17
Supplement: 12864_2014_6630_MOESM1_ESM.pdf [file 12864_2014_6630_MOESM1_ESM.pdf]

| <b>Figure 2A</b> | <b>Dataset</b>   | <b>PSEUDO</b> | <b>INTG</b>   | <b>CDS<sup>P</sup></b> |                        |                        |
|------------------|------------------|---------------|---------------|------------------------|------------------------|------------------------|
|                  | PSEUDO           | 1             | 2.45E-07      | 0                      |                        |                        |
|                  | INTG             | 2.45E-07      | 1             | 0                      |                        |                        |
|                  | CDS <sup>P</sup> | 0             | 0             | 1                      |                        |                        |
| <b>Figure 2B</b> |                  | <b>PSEUDO</b> | <b>LNCRNA</b> | <b>INTG</b>            | <b>CDS<sup>P</sup></b> | <b>TVAG</b>            |
|                  | PSEUDO           | 1             | 8.36E-16      | 5.46E-79               | 1.99E-264              | 0                      |
|                  | LNCRNA           | 8.36E-16      | 1             | 1.06E-44               | 0                      | 0                      |
|                  | INTG             | 5.46E-79      | 1.06E-44      | 1                      | 0                      | 0                      |
|                  | CDS <sup>P</sup> | 1.99E-264     | 0             | 0                      | 1                      | 0                      |
|                  | TVAG             | 0             | 0             | 0                      | 0                      | 1                      |
| <b>Figure 2C</b> |                  | <b>PSEUDO</b> | <b>LNCRNA</b> | <b>INTG</b>            | <b>RND<sup>N</sup></b> | <b>CDS<sup>P</sup></b> |
|                  | PSEUDO           | 1             | 0.02          | 2.73E-15               | 8.22E-129              | 0                      |
|                  | LNCRNA           | 0.02          | 1             | 8.77E-29               | 2.14E-174              | 0                      |
|                  | INTG             | 2.73E-15      | 8.77E-29      | 1                      | 1.55E-102              | 0                      |
|                  | RND <sup>N</sup> | 8.22E-129     | 2.14E-174     | 1.55E-102              | 1                      | 0                      |
|                  | CDS <sup>P</sup> | 0             | 0             | 0                      | 0                      | 1                      |
| <b>Figure 2D</b> |                  | <b>PSEUDO</b> | <b>LNCRNA</b> | <b>INTG</b>            | <b>RND<sup>N</sup></b> | <b>CDS<sup>P</sup></b> |
|                  | PSEUDO           | 1             | 0.26          | 1.66E-61               | 1.29E-61               | 0                      |
|                  | LNCRNA           | 0.26          | 1             | 6.76E-56               | 1.58E-56               | 1.52E-289              |
|                  | INTG             | 1.66E-61      | 6.76E-56      | 1                      | 2.04E-05               | 0                      |
|                  | RND <sup>N</sup> | 1.29E-61      | 1.58E-56      | 2.04E-05               | 1                      | 0                      |
|                  | CDS <sup>P</sup> | 0             | 1.52E-289     | 0                      | 0                      | 1                      |
