# Supplementary material for: The parasite Trichomonas vaginalis expresses thousands of pseudogenes and long non-coding RNAs independently from functional neighbouring genes
Source: PubMed Central journal article supplement (PMC4223856; doi:10.1186/1471-2164-15-906), 2014-10-17
Supplement: 12864_2014_6630_MOESM3_ESM.pdf [file 12864_2014_6630_MOESM3_ESM.pdf]

| <b>Dataset</b> | <b>Orientation</b> | <b>Location</b> | <b>Transcribed</b> | <b>Non-transcribed</b> |    |
|----------------|--------------------|-----------------|--------------------|------------------------|----|
| <b>PSEUDO</b>  | Convergent         | Upstream        | 214                | 51                     |    |
|                |                    | Downstream      | 203                | 62                     |    |
|                | Divergent          | Upstream        | 220                | 40                     |    |
|                |                    | Downstream      | 208                | 52                     |    |
|                | Co-oriented        | Upstream        | 241                | 54                     |    |
|                |                    | Downstream      | 228                | 67                     |    |
|                | Anti-oriented      | Upstream        | 203                | 53                     |    |
|                |                    | Downstream      | 180                | 76                     |    |
|                | <b>LNCRNA</b>      | Convergent      | Upstream           | 191                    | 42 |
|                |                    |                 | Downstream         | 183                    | 50 |
| Divergent      |                    | Upstream        | 377                | 57                     |    |
|                |                    | Downstream      | 360                | 74                     |    |
| Co-oriented    |                    | Upstream        | 267                | 62                     |    |
|                |                    | Downstream      | 272                | 57                     |    |
| Anti-oriented  |                    | Upstream        | 287                | 47                     |    |
|                |                    | Downstream      | 273                | 61                     |    |
