# Supplementary material for: The parasite Trichomonas vaginalis expresses thousands of pseudogenes and long non-coding RNAs independently from functional neighbouring genes
Source: PubMed Central journal article supplement (PMC4223856; doi:10.1186/1471-2164-15-906), 2014-10-17

| Motif | LNCRNA |         | PSEUDO |         | CDS <sup>P</sup> |           | INTG  |         |
|-------|--------|---------|--------|---------|------------------|-----------|-------|---------|
|       | Sides  | e value | Sides  | e value | Sides            | e value   | Sides | e value |
| 1     | 16.8%  | 1.0e-19 | 15.5%  | 8.8e-16 | 29.1%            | 2.3e-0611 | 2.7%  | 7.2e-43 |
| 2     | 5.5%   | 1.4e-49 | 5.7%   | 4.8e-22 | 19.9%            | 1.1e-1232 | 2.2%  | 1.0e-17 |
| 3     | 1.2%   | 3.7e-02 | 4.7%   | 1.7e-22 | 7.5%             | 7.4e-1156 | 1.6%  | 6.6e-18 |
| 4     | 0.9%   | 3.9e-01 | 3.2%   | 1.8e-11 | 4.0%             | 2.9e-0245 | 1.0%  | 6.9e-09 |
| 5     | 0.4%   | 8.0e+01 | 2.6%   | 2.9e-16 | 0.8%             | 3.7e-0075 | 0.6%  | 4.5e-06 |

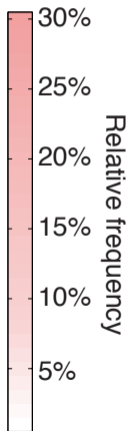

Supplement: 12864_2014_6630_MOESM4_ESM.pdf [file 12864_2014_6630_MOESM4_ESM.pdf]
